# Supplementary material for: The Wetland Intrinsic Potential tool: Mapping wetland intrinsic potential through machine learning of multi-scale remote sensing proxies of wetland indicators
Source: Copernicus journal article supplement (doi:10.5194/egusphere-2022-665), 2022-10-11

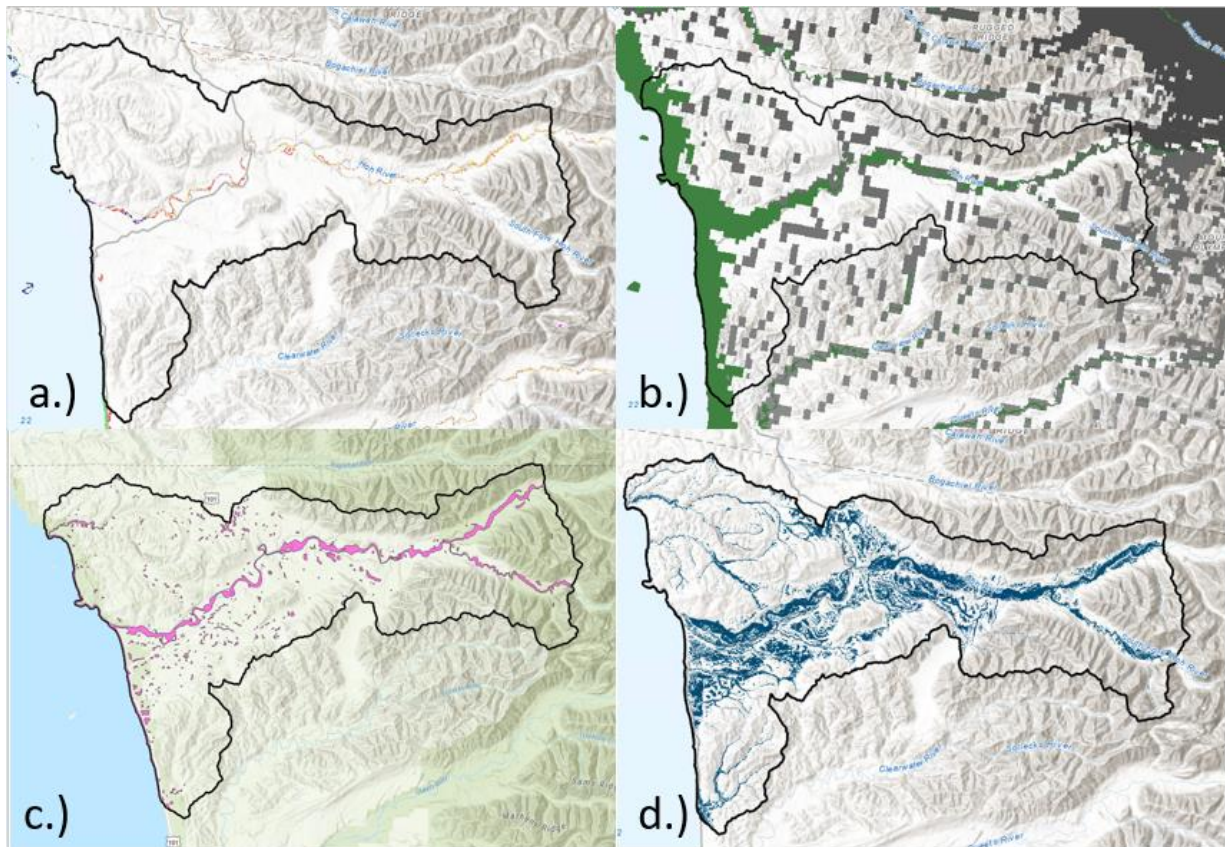

Figure 1: Comparison of results for the Hoh watershed to two recently published Global wetland datasets, Xiang et al 2023(a.) and Lane et al. 2023 (b.) to the National Wetland Inventory (c.) and our wetland classification (d.).

Figure 2: Graph showing the relationship between overall accuracy for the WIP model for the Hoh watershed. This graph may be helpful in selection of a probability cutoff (threshold) that divide WIP probability into a binary classification of wetland and upland. Small changes in the cutoff value for the Hoh watershed will impact errors of omission and commission, but won't greatly impact the overall accuracy.

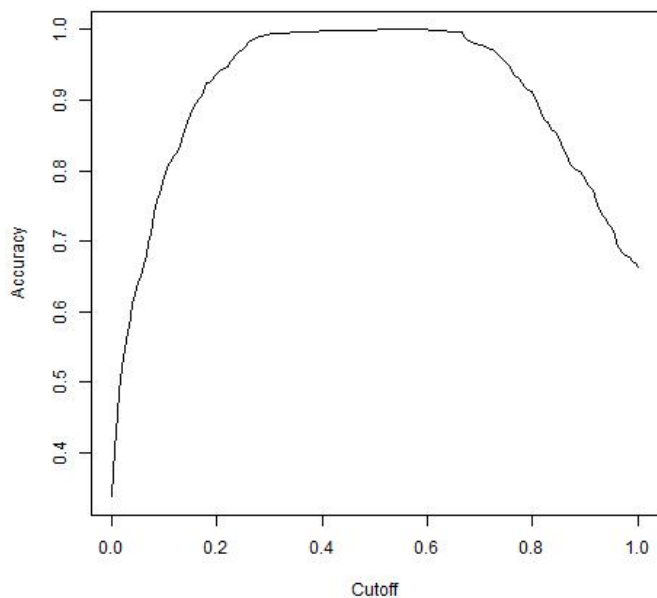

Supplement: Supplementary file [file egusphere-2022-665-AC1-supplement.pdf]
